# Supplementary material
Source: Royal Society of Chemistry journal article supplement (doi:10.1039/d6ta00642f)
Supplement: d6ta00642f1.pdf [file d6ta00642f1.pdf]

# 3D-Printed Bi<sub>2</sub>Te<sub>3</sub>-based Thermoelectric Devices with Phase Change Heat Sinks: Toward Efficient Energy Harvesting and Ultra-Fast Temperature Sensing

Jian Song<sup>1,2</sup>, Gong-Peng Cui<sup>1,2</sup>, Chang-Ping Feng<sup>\*1,2</sup>, Zheng-Ting Song<sup>2</sup>, Chen-Yu Zhang<sup>2</sup>, Hong-  
Bo Lan<sup>2</sup>, Hong-Jing Shang<sup>\*1,3,4</sup>, Fa-Zhu Ding<sup>\*1,3,4</sup>

<sup>1</sup>Key Laboratory of Applied Superconductivity and Institute of Electrical Engineering, Chinese Academy of Sciences, Beijing 100190, China

<sup>2</sup>Shandong Engineering Research Center for Additive Manufacturing, Qingdao University of Technology, Qingdao 266520, Shandong, People's Republic of China.

<sup>3</sup>University of Chinese Academy of Sciences, Beijing 100049, China.

<sup>4</sup>Shandong Key Laboratory of Advanced Electromagnetic Conversion Technology and Institute of Electrical Engineering and Advanced Electromagnetic Drive Technology, Qilu Zhongke, Jinan 250100, China.

---

**Corresponding authors:**

*E-mail address:* fengc\_p@163.com(CP Feng); shanghongjing@mail.iee.ac.cn(HJ Shang); dingfazhu@mail.iee.ac.cn(FZ Ding)

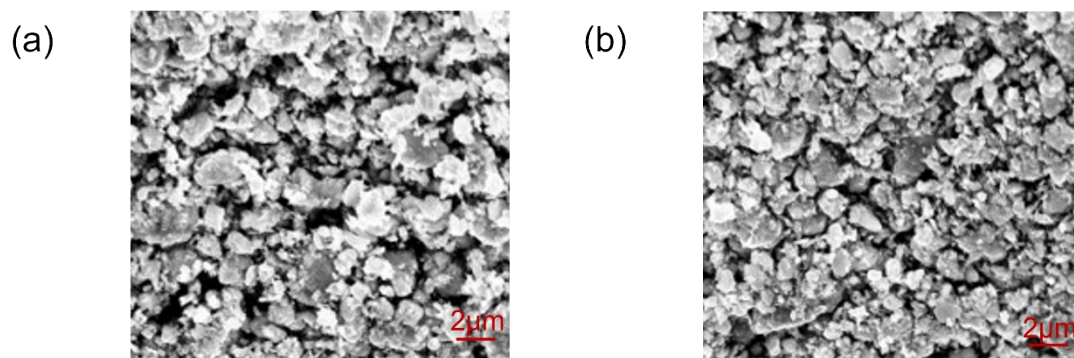

**Fig. S1** Scanning electron microscopy(SEM). (a) P-type sample; (b) N-type sample.

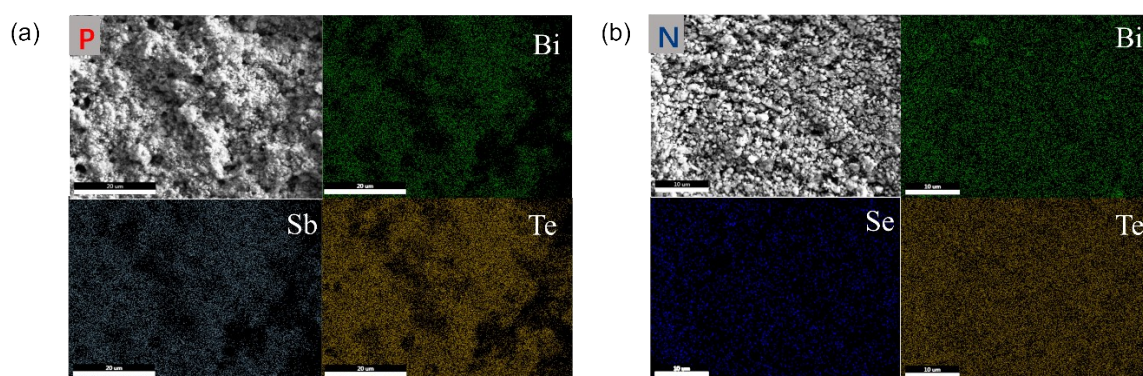

**Fig. S2** EDS energy spectrum analysis of 3D printed thermoelectric inks. (a) P-type sample; (b) N-type sample.

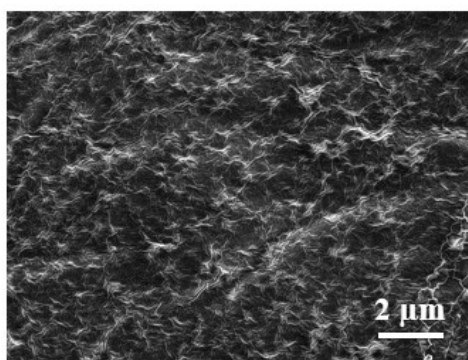

**Fig. S3** Cross-sectional scanning electron microscope images of composite phase change materials.

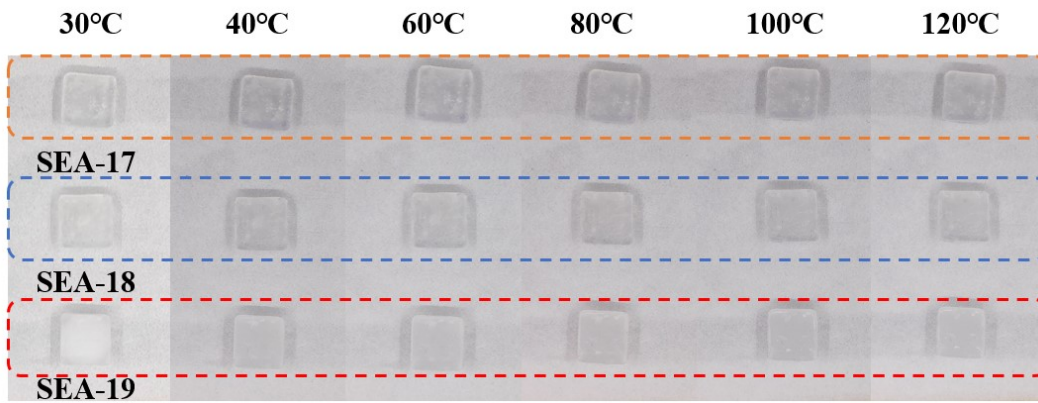

**Fig. S4** Thermal Stability Testing of SEA-17, SEA-18 and SEA-19 Composite Phase Change Materials

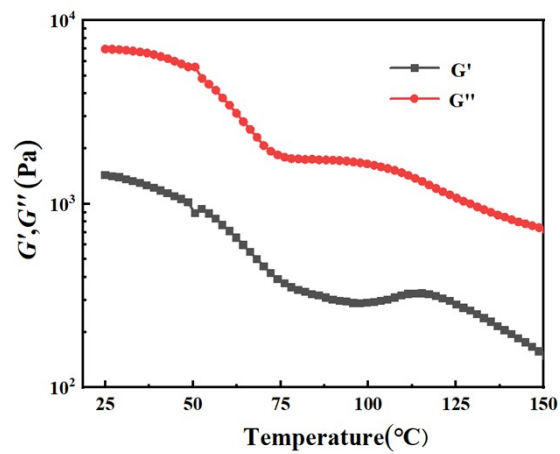

**Fig. S5** Rheological properties of composite phase change materials.

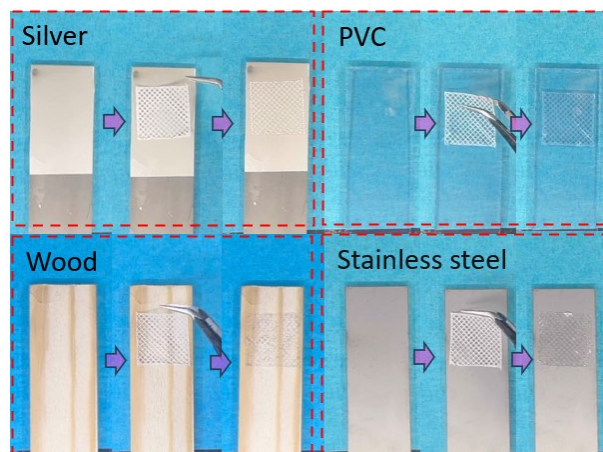

**Fig. S6** Adhesion test of printed composite phase change materials on different substrates

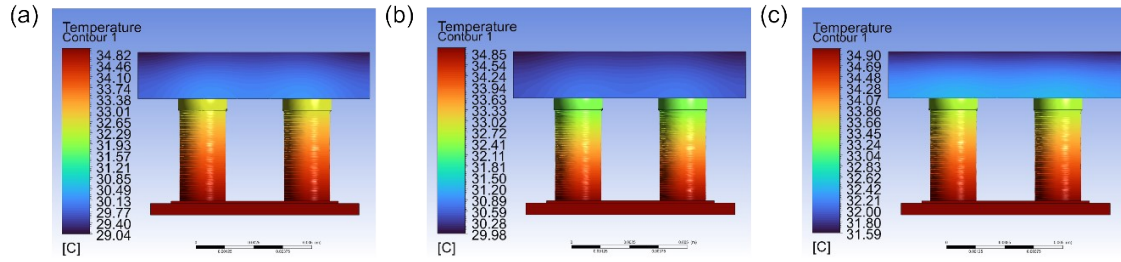

**Fig. S7** The phase transition-thermoelectric coupling simulations (a-c) are in orderSEA-17, SEA-18, and SEA-19 composite PCMs

**Table S1** TE properties and power performance of TE materials

| Material                                                                                                           | Methods         | TE legs  | $\sigma$ (S m <sup>-1</sup> ) | $\Delta T$ (K) | $V_{\text{out}}$ (mV) | $P$ ( $\mu$ W) | Citation  |
|--------------------------------------------------------------------------------------------------------------------|-----------------|----------|-------------------------------|----------------|-----------------------|----------------|-----------|
| p- Bi <sub>0.5</sub> Sb <sub>1.5</sub> Te <sub>3</sub><br>n- Bi <sub>2</sub> Te <sub>2.7</sub> Se <sub>0.3</sub>   | DIW             | 6 pairs  | 42400<br>125000               | 50             | 42.2                  | 32.78          | 1         |
| p- Bi <sub>0.4</sub> Sb <sub>1.6</sub> Te <sub>3</sub><br>n- Bi <sub>2</sub> Te <sub>3</sub>                       | Screen-printing | 1 pairs  | ~65000<br>50000               | 20             | 13.8                  | 2.9            | 2         |
| p- Bi <sub>0.5</sub> Sb <sub>1.5</sub> Te <sub>3</sub><br>n- Ag <sub>2</sub> Se                                    | DIW             | 32 pairs | 14800<br>58600                | 20             | ~308.9<br>2           | ~8480          | 3         |
| p- Bi <sub>0.4</sub> Sb <sub>1.6</sub> Te <sub>3</sub><br>n- Bi <sub>2</sub> Te <sub>2.6</sub> Se <sub>0.4</sub>   | DIW             | N/A      | 27900<br>36100                | 20             | ~7.5                  | ~520.9         | 4         |
| p- Bi <sub>0.5</sub> Sb <sub>1.5</sub> Te <sub>3</sub><br>n- Bi <sub>2</sub> Te <sub>2.7</sub> Se <sub>0.3</sub>   | DIW             | 1 pairs  | 4000<br>1000                  | 80             | 38                    | 29             | 5         |
| p- Bi <sub>0.55</sub> Sb <sub>1.45</sub> Te <sub>3</sub><br>n- Bi <sub>2</sub> Te <sub>2.7</sub> Se <sub>0.3</sub> | DIW             | 2 pairs  | 1173.5<br>879.3               | 13             | 9.07                  | 0.3775         | This work |

**Reference:**

- 1 K. Kim, K. Park, J. Song, J. E. Lee, D. Son and J. S. Son, *Npj Flex. Electron.*, 2026, **10**, 30–38.
- 2 W. Chen, X. Shi, M. Li, T. Liu, Y. Mao, Q. Liu, M. Dargusch, J. Zou, G. Q. Lu and Z.-G. Chen, *Science*, 2024, **386**, 1265–1271.
- 3 S. Xu, S. Horta, A. Lawal, K. Maji, M. Lorion and M. Ibáñez, *Science*, 2025, **387**, 845–850.
- 4 X. D. Zhang, J. Chen, H. Zhang, P. Zhu, R. Wang, F. Li and B. Li, *J. Materiomics*, 2023, **9**, 328–337.
- 5 M. Bian, Z. Xu, X. Tang, H. Jia, Y. Wang and A. Cabot, *J. Alloys Compd.*, 2024, **976**, 173202.
